# Supplementary material for: Upregulation of IGF2BP2 Promotes Oral Squamous Cell Carcinoma Progression That Is Related to Cell Proliferation, Metastasis and Tumor-Infiltrating Immune Cells
Source: PubMed Central journal article supplement (PMC8921988; doi:10.3389/fonc.2022.809589), 2022-03-01
Supplement: Image_1.pdf [file Image_1.pdf]

# Supplementary Material

## Supplementary Figures

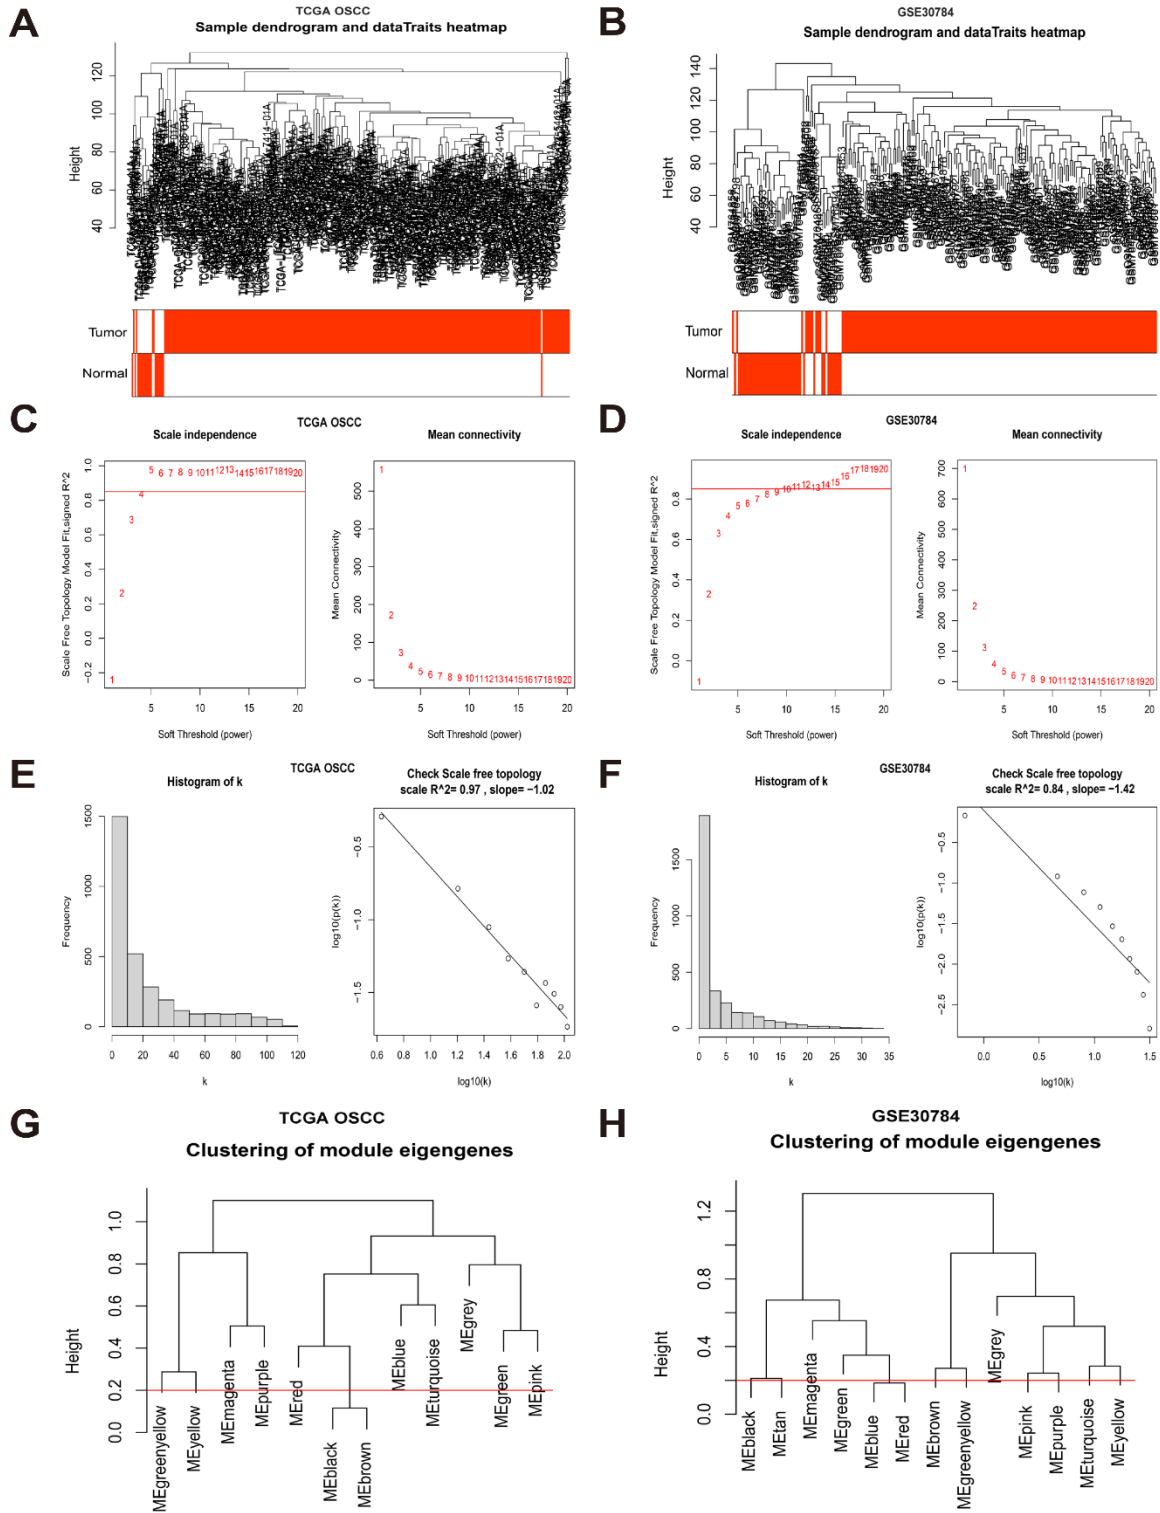

**Supplementary Figure 1.** Construction of the weighted gene coexpression network. **(A)** Clustering dendrogram for the TCGA-OSCC dataset after removing 11 outliers (N=325). **(B)** Cluster dendrogram for the GSE30784 dataset after removing 3 outliers (N=209). **(C, D)** Analysis of scale-free gene network topology and mean connectivity of various soft-threshold powers for the TCGA-OSCC **(C)** and GSE30784 datasets **(D)**. **(E, F)** Scale-free network topology test based on soft-threshold power for the TCGA-OSCC **(E)** and GSE30784 datasets **(F)**. **(G, H)** Clustering of consensus module eigengenes for the TCGA-OSCC **(G)** and GSE30784 datasets **(H)**; genes with correlations between modules  $> 0.8$ , below the red line, were merged.

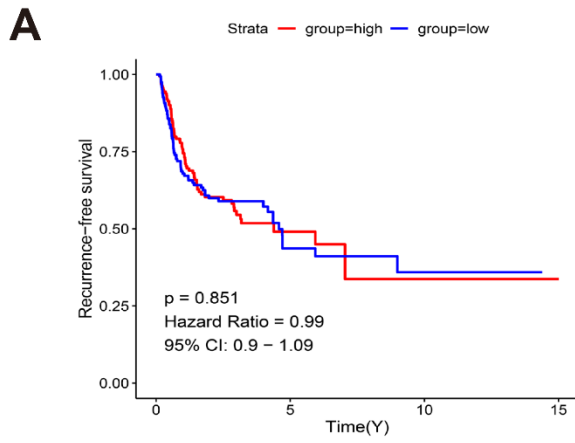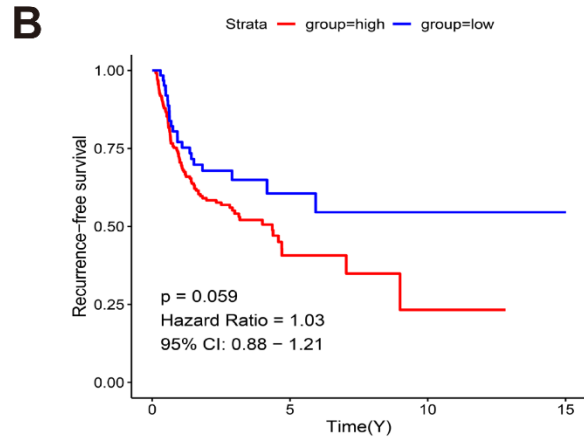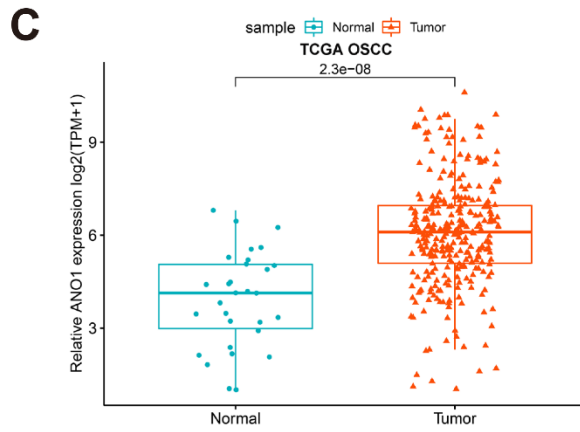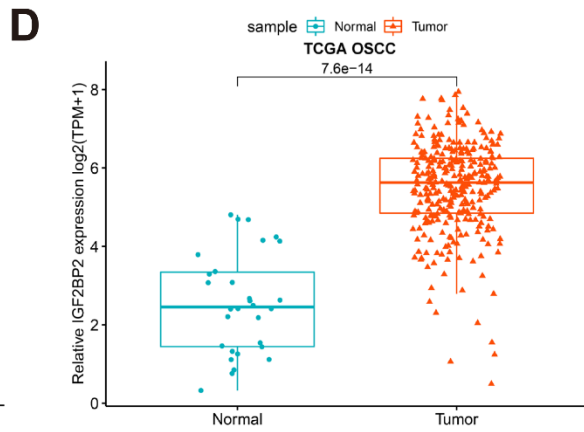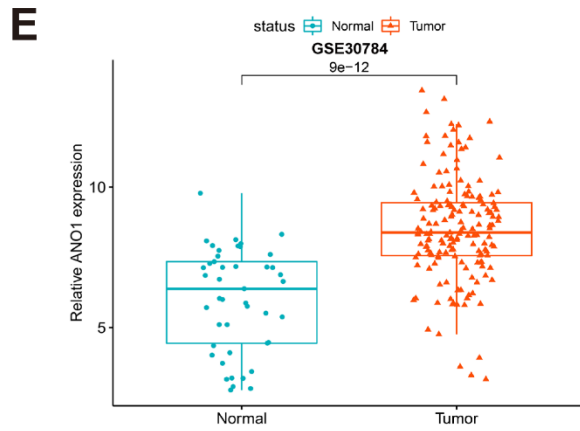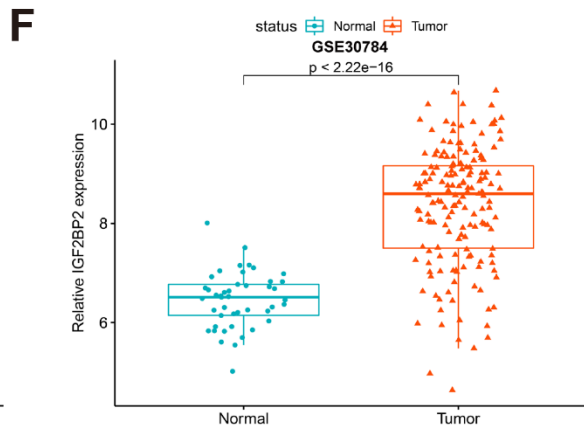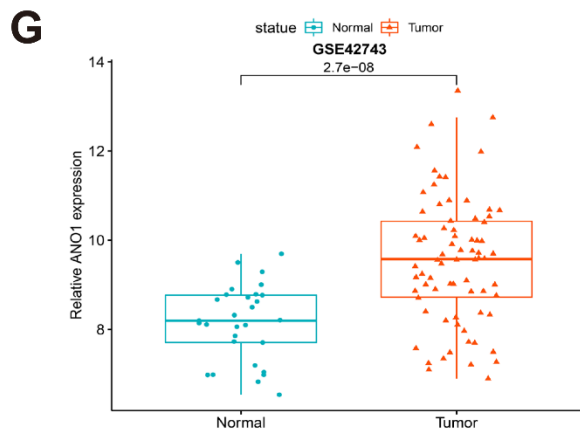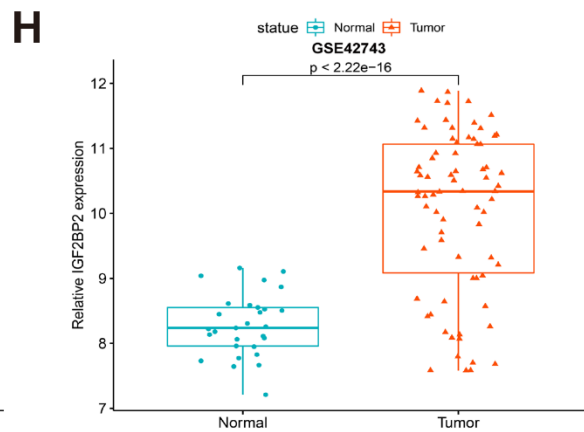

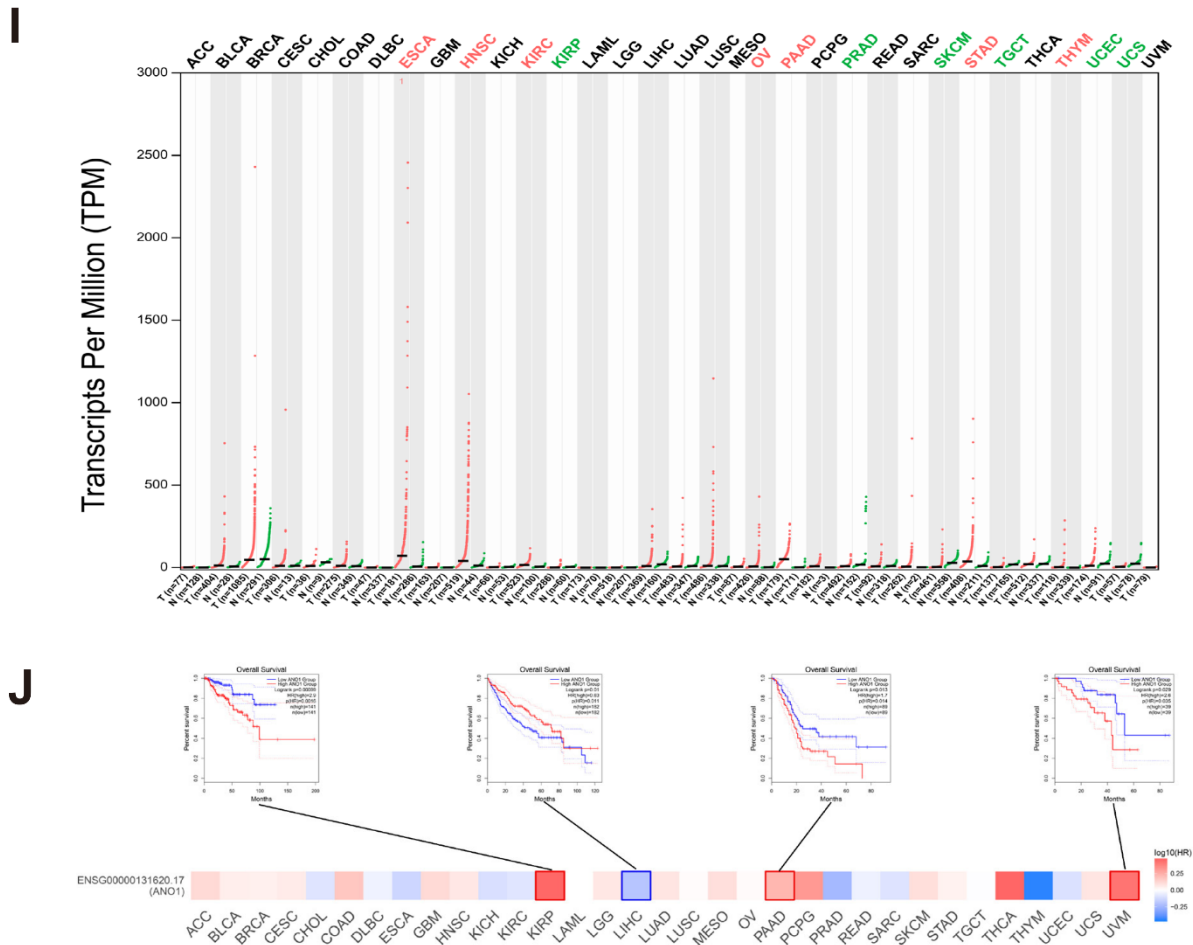

**Supplementary Figure 2.** Expression and survival analysis of ANO1 and IGF2BP2. **(A, B)** Survival curves of RFS based on OSCC patients in the TCGA database with high and low ANO1 and IGF2BP2 expression. **(C)** ANO1 expression in normal (N=30) and OSCC (N=306) tissues from the TCGA database. **(D)** IGF2BP2 expression in normal (N=30) and OSCC tissues (N=306) from the TCGA database. **(E)** ANO1 expression in normal (N=45) and OSCC tissues (N=167) from the GSE30784 dataset. **(F)** IGF2BP2 expression in normal (N=45) and OSCC tissues (N=167) from the GSE30784 dataset. **(G)** ANO1 expression in normal (N=29) and OSCC tissues (N=74) from the GSE42743 dataset. **(H)** IGF2BP2 expression in normal (N=29) and OSCC tissues (N=74) from the GSE42743 dataset. **(G)** Differential expression of ANO1 in 33 different tumor tissues and paired normal tissues from the TCGA and GTEx databases. Each dot represents the expression of samples. **(H)** The prognostic impact of ANO1 expression level based on the survival heatmap, showing significance in KIRP, LIHC, PAAD, and UVM.

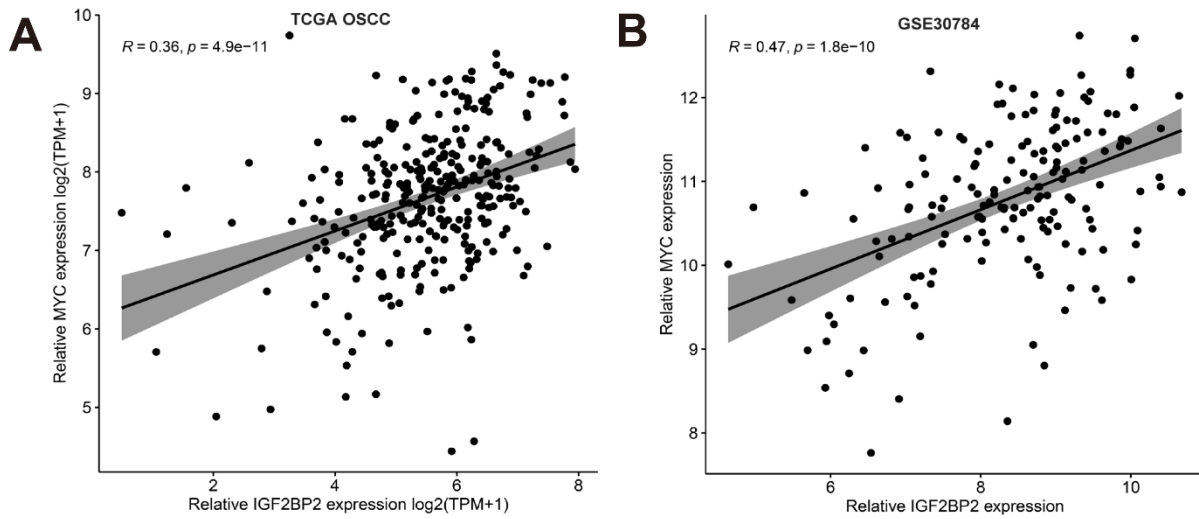

**Supplementary Figure 2.** Correlation between IGF2BP2 and MYC expression. **(A)** Correlation between IGF2BP2 and CD8A expression in TCGA-OSCC dataset. **(B)** Correlation between IGF2BP2 and MYC expression in GSE30784 dataset.
